# Supplementary material for: Myostatin regulates fatty acid desaturation and fat deposition through MEF2C/miR222/SCD5 cascade in pigs
Source: PubMed Central journal article supplement (PMC7584575; doi:10.1038/s42003-020-01348-8), 2020-10-23
Supplement: 42003_2020_1348_MOESM1_ESM.pdf [file 42003_2020_1348_MOESM1_ESM.pdf]

## 1、 Supplementary Figures

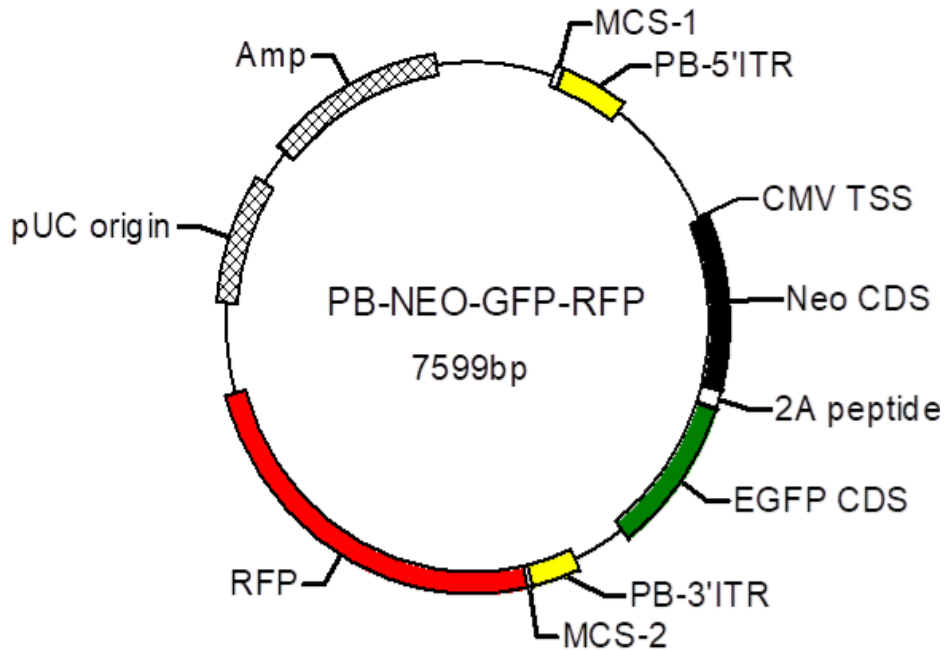

**Supplementary Fig. 1.** Schematic of targeting plasmid backbone PB-NEO-GFP-RFP

PB-5'ITR and PB-3'ITR represent the 5' and 3' inverted tandem repeats of Piggybac transposase. CMV TSS, transcription start site of CMV promoter. MCS-1 and MCS-2 represent multiple cloning sites.

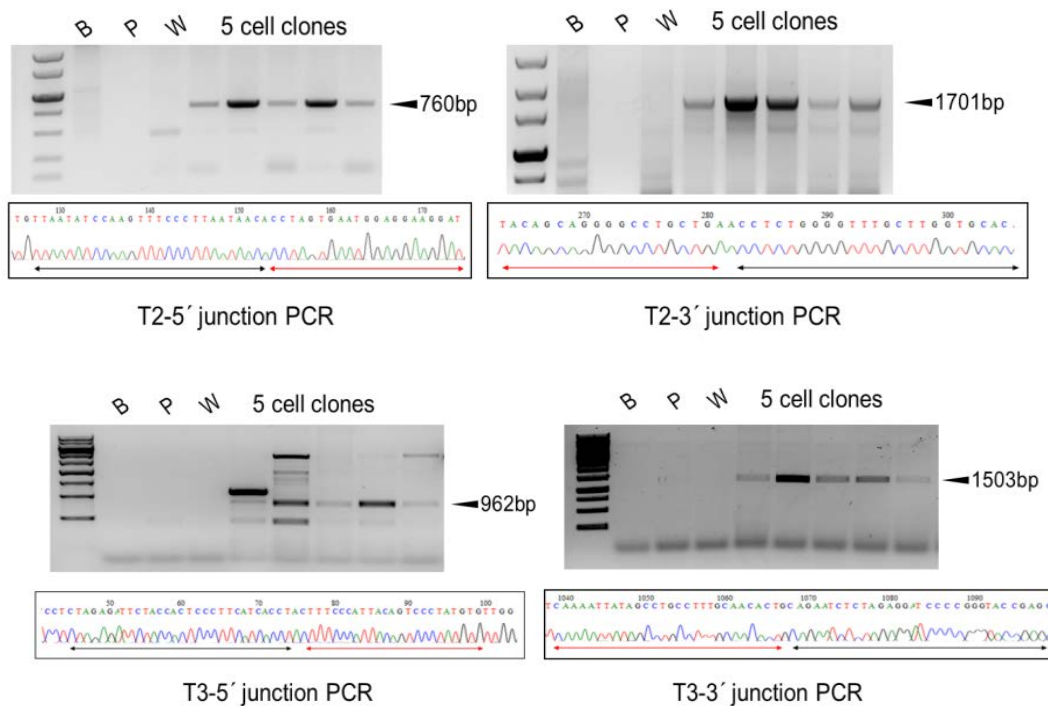

**Supplementary Fig. 2.** Representative image of DUFAS-mediated MSTN targeting at T2 and T3 sites

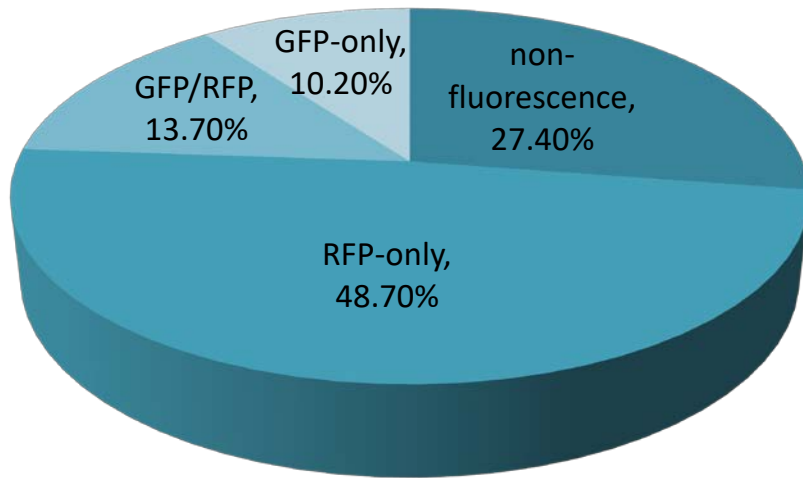

Supplementary Fig. 3 Distribution of cell clones with distinctive fluorescence post Neomycin selection

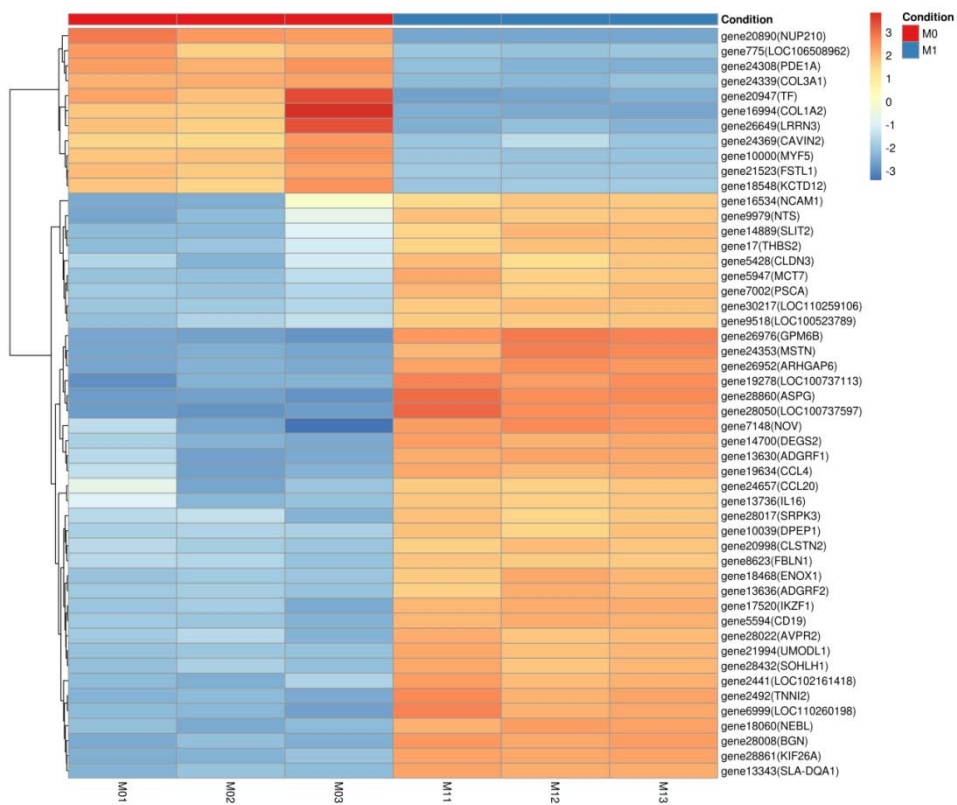

Supplementary Fig. 4. Heatmap of top 50 DE mRNAs

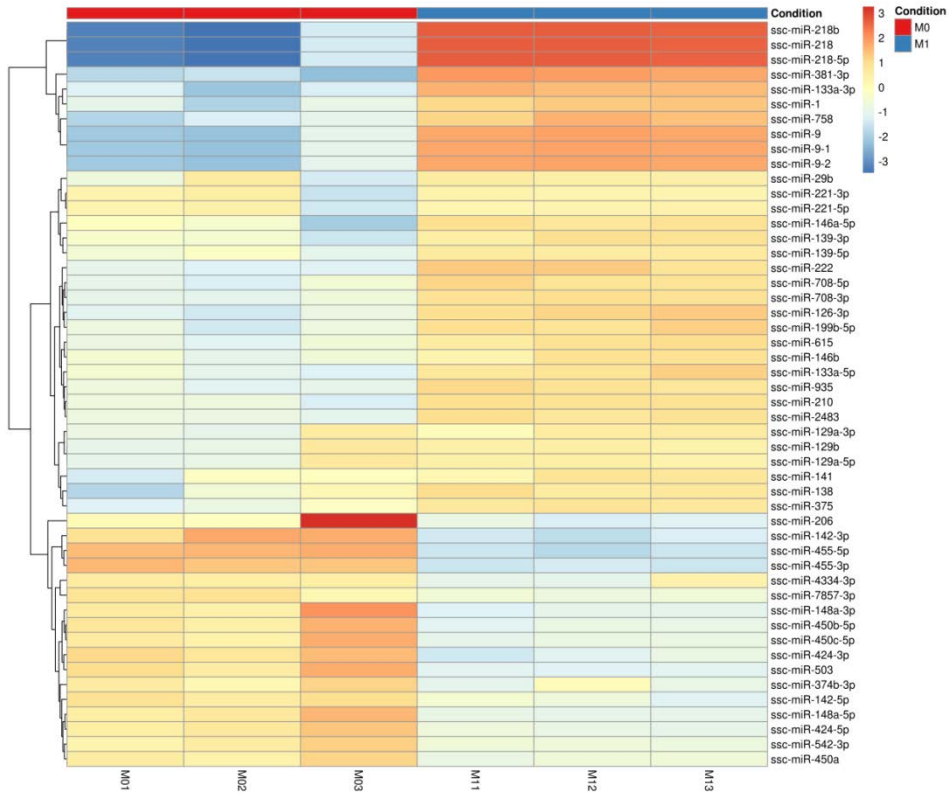

Supplementary Fig. 5. Heatmap of top 50 DE miRNAs

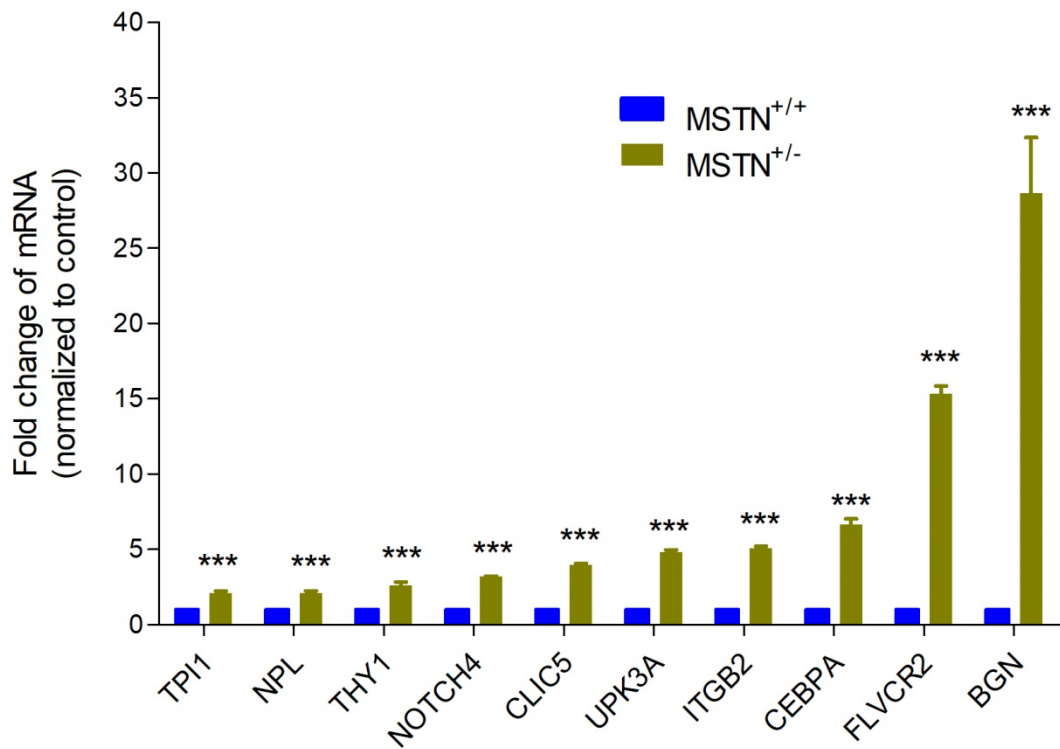

Supplementary Fig. 6. Q-PCR validation of the expression of 10 up-regulated mRNAs

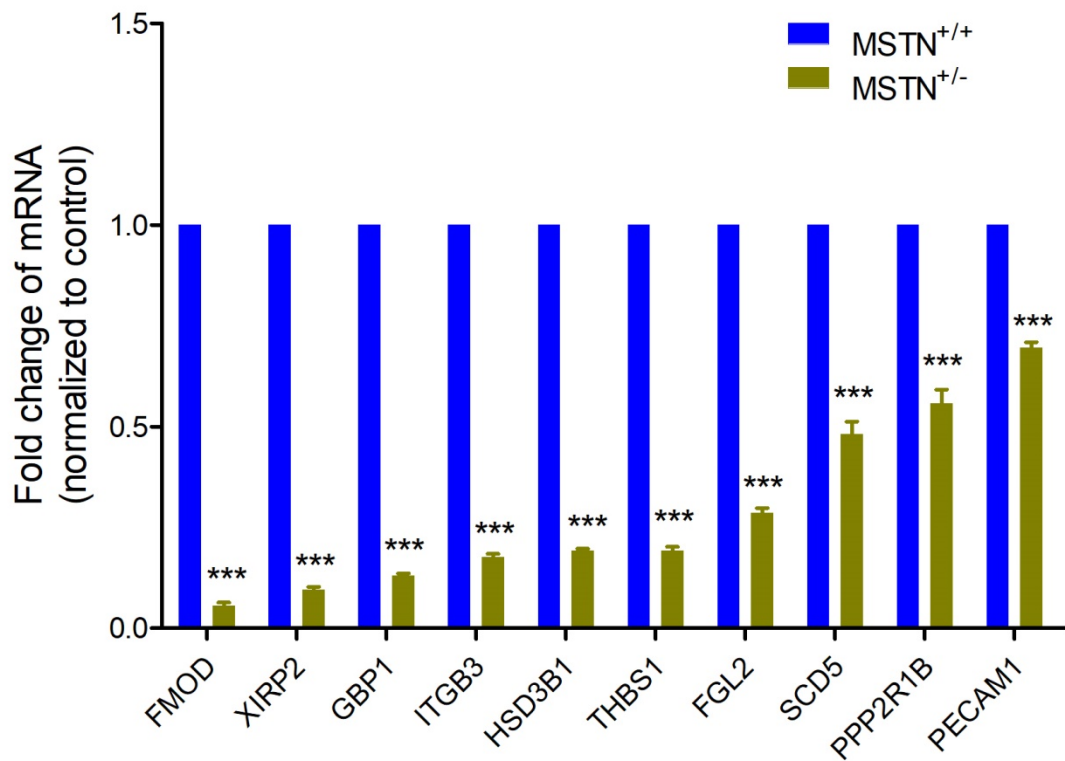

Supplementary Fig. 7. Q-PCR validation of the expression of 10 down-regulated mRNAs

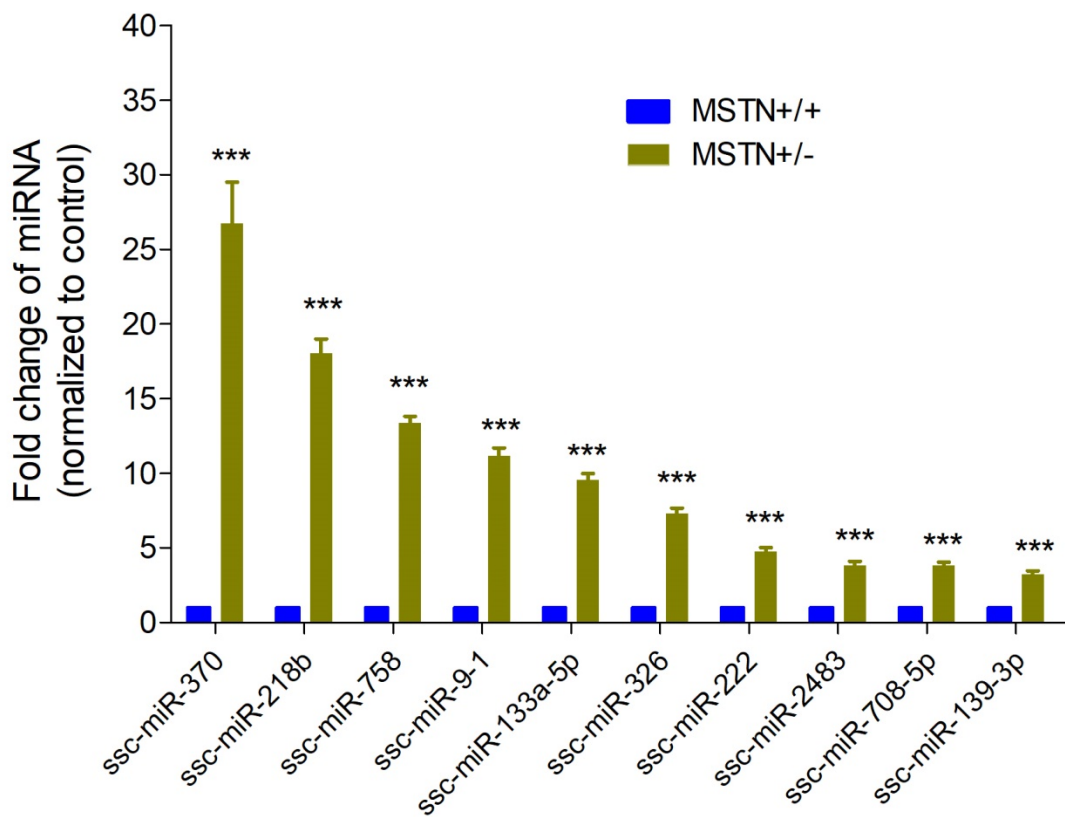

Supplementary Fig. 8. Q-PCR validation of the expression of 10 up-regulated miRNAs

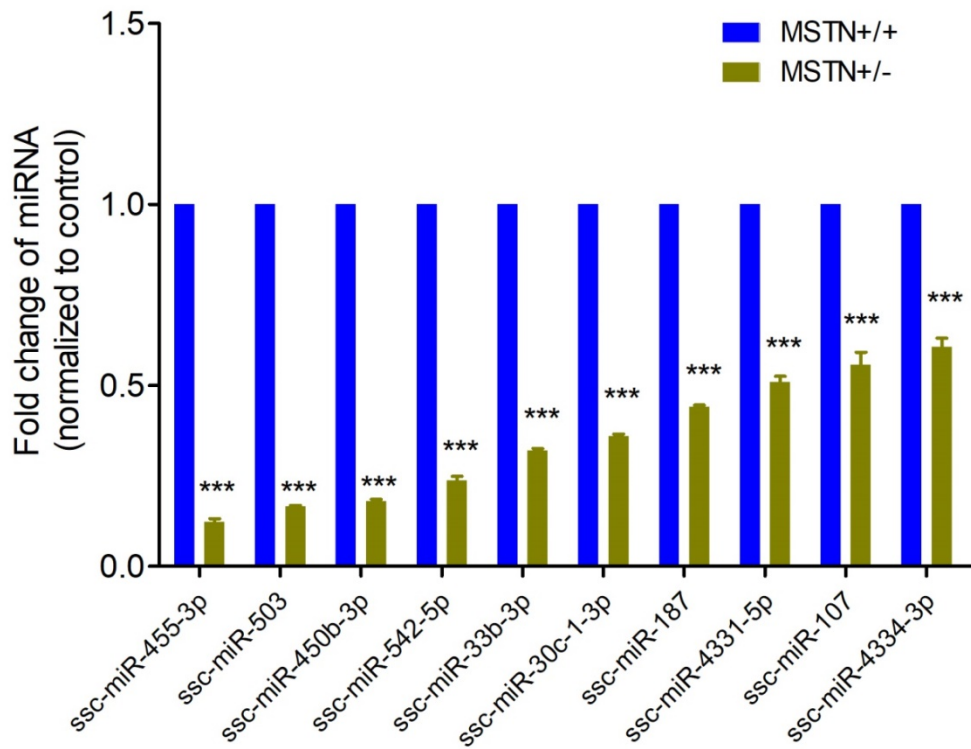

Supplementary Fig. 9. Q-PCR validation of the expression of 10 down-regulated miRNAs

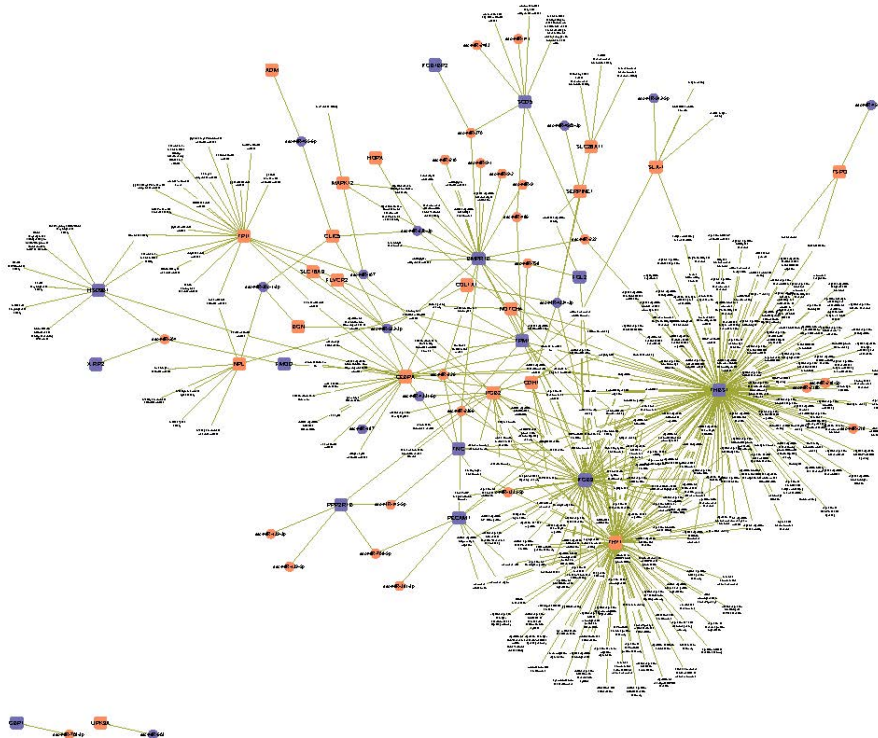

Supplementary Fig. 10. DE miRNA-mRNA network

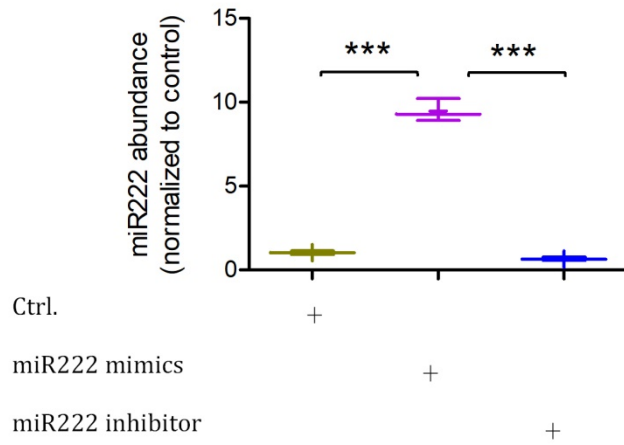

Supplementary Fig. 11. miR222 abundance with the treatment of miR222 mimics and inhibitor

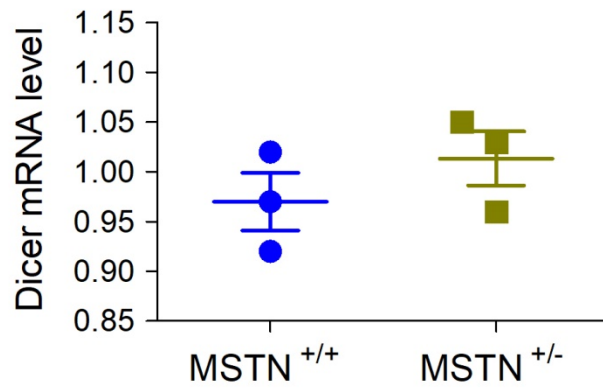

Supplementary Fig. 12. Dicer mRNA abundance in MSTN KO and wild-type pigs

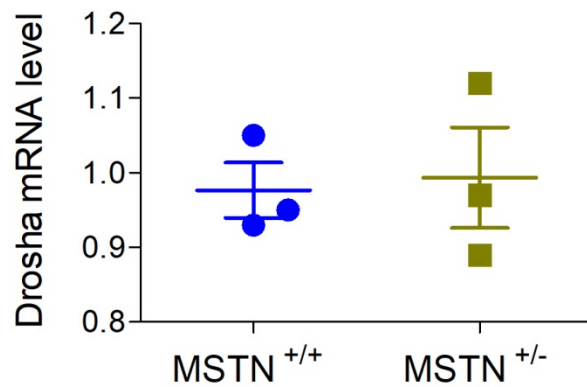

Supplementary Fig. 13. Drosha mRNA abundance in MSTN KO and wild-type pigs

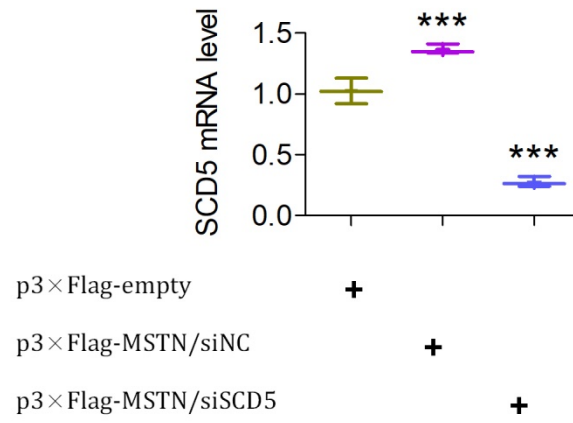

**Supplementary Fig. 14.** SCD5 mRNA abundance after treatment of siRNA

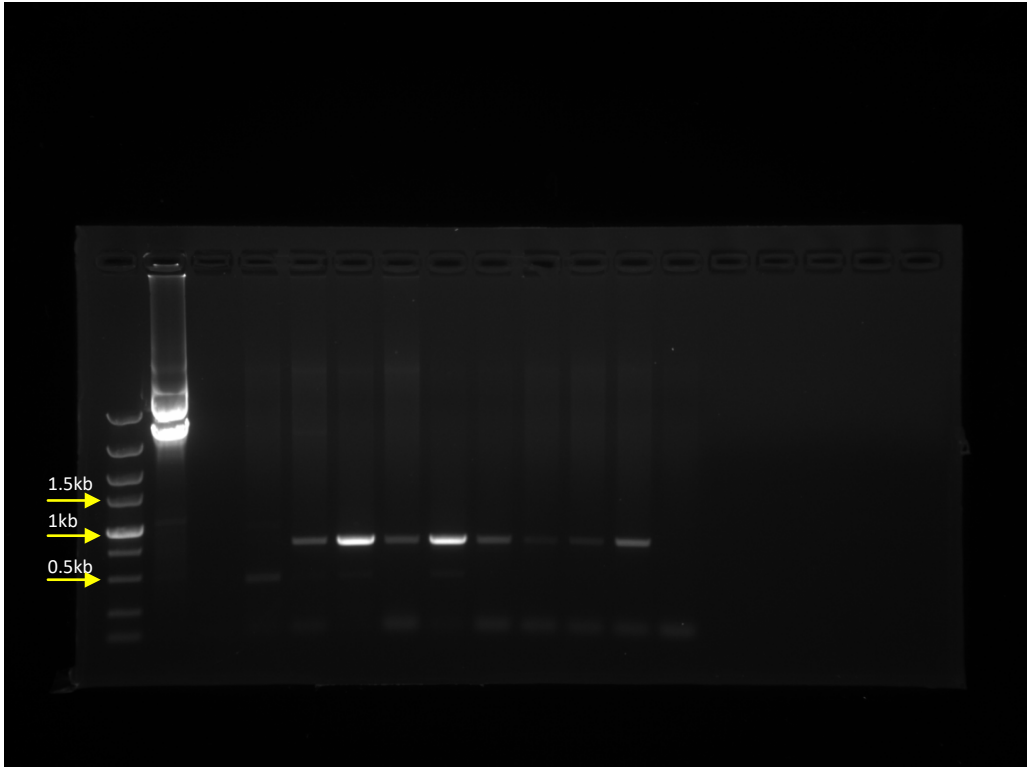

Supplementary Fig. 15 Uncropped gel image of junction PCR

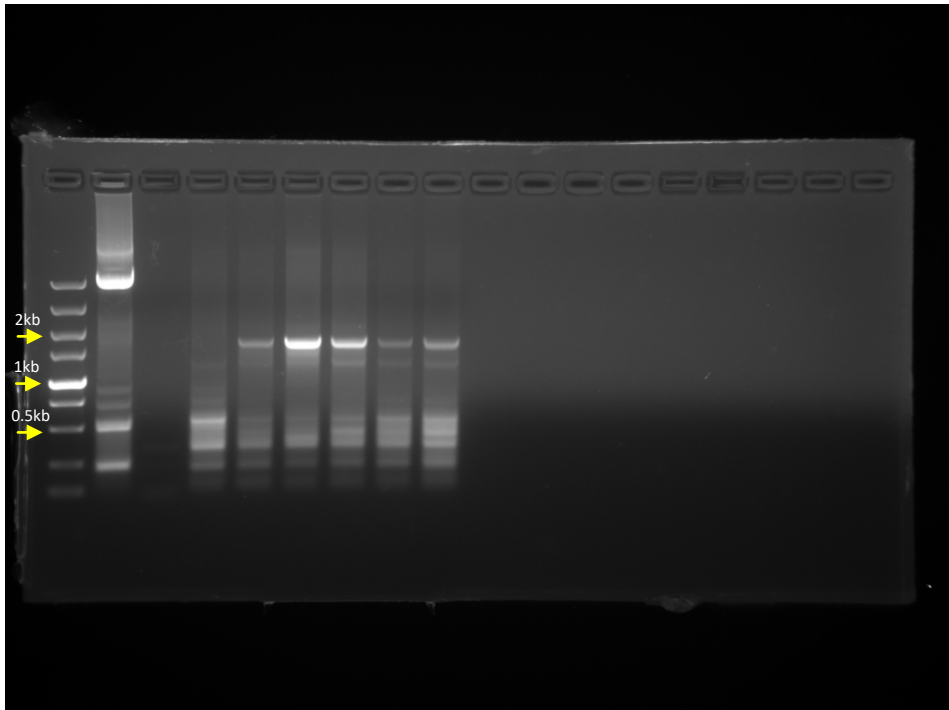

Supplementary Fig. 16 Uncropped gel image of junction PCR



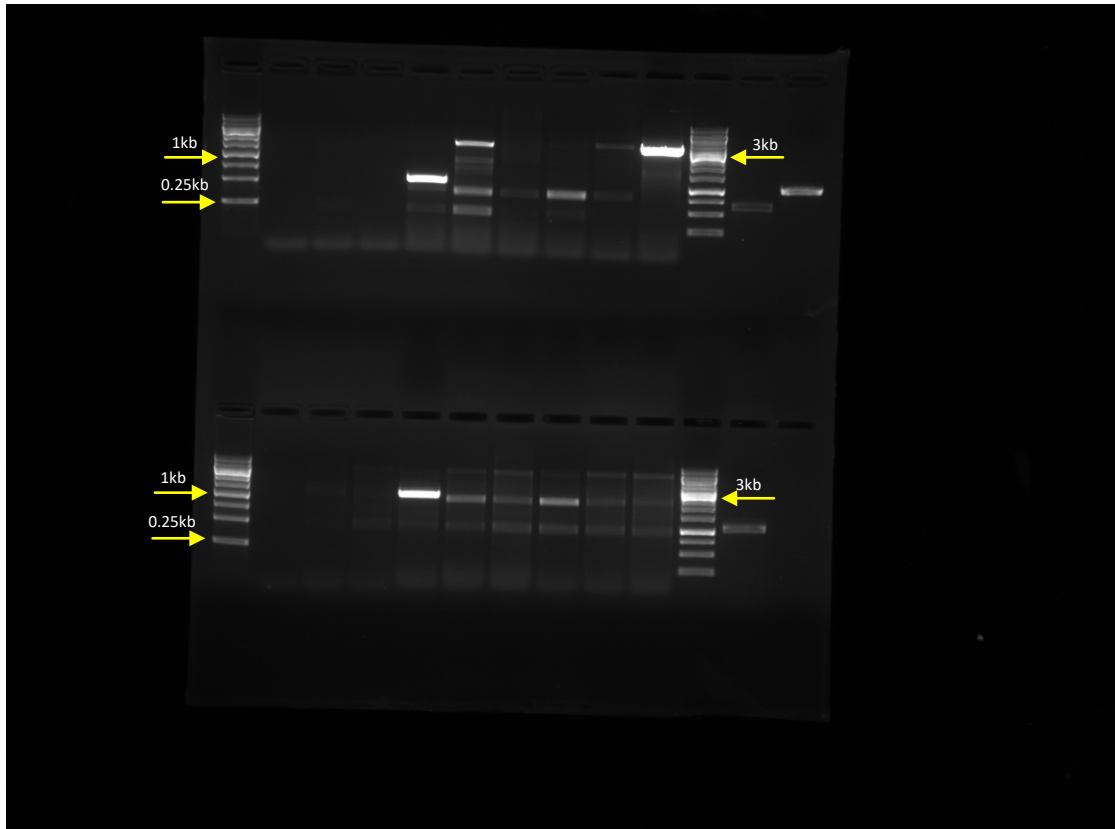

Supplementary Fig. 17 Uncropped gel image of junction PCR

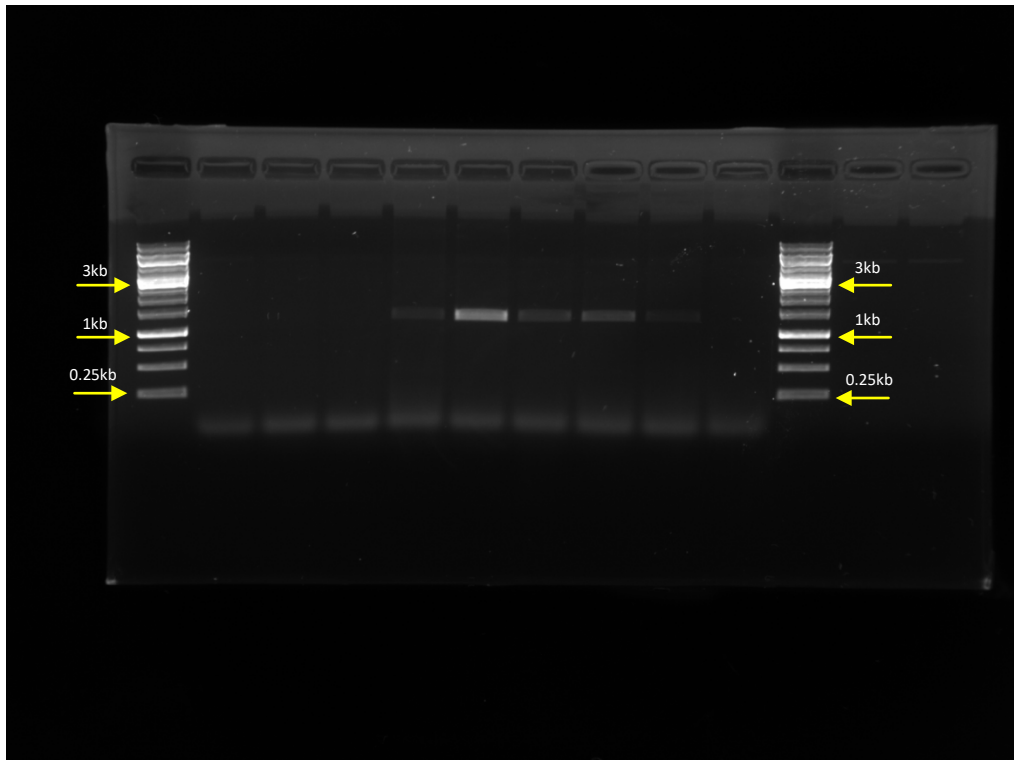

Supplementary Fig. 18 Uncropped gel image of junction PCR

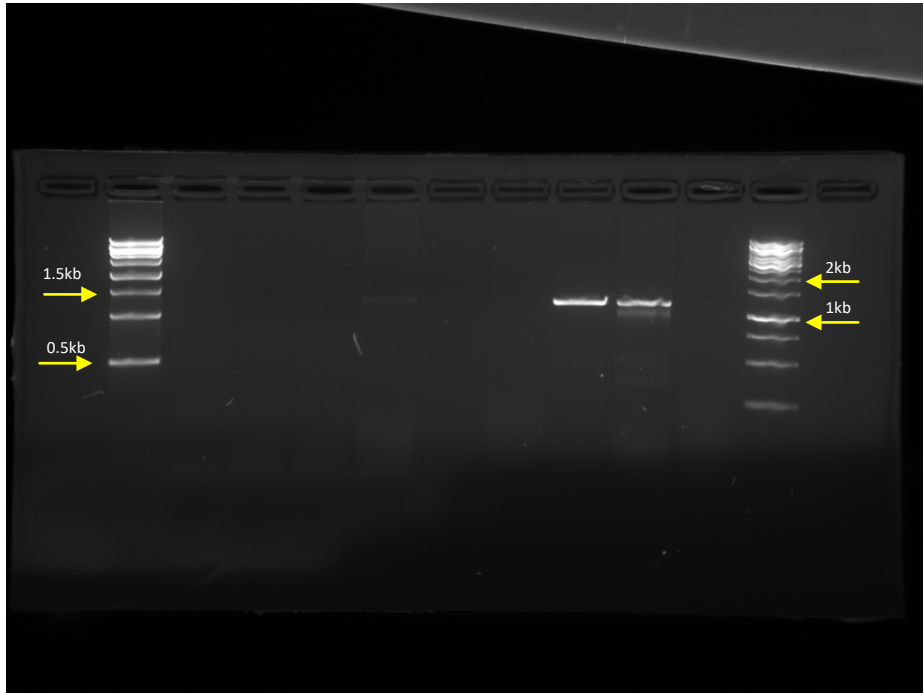

Supplementary Fig. 19 Uncropped gel image of junction PCR

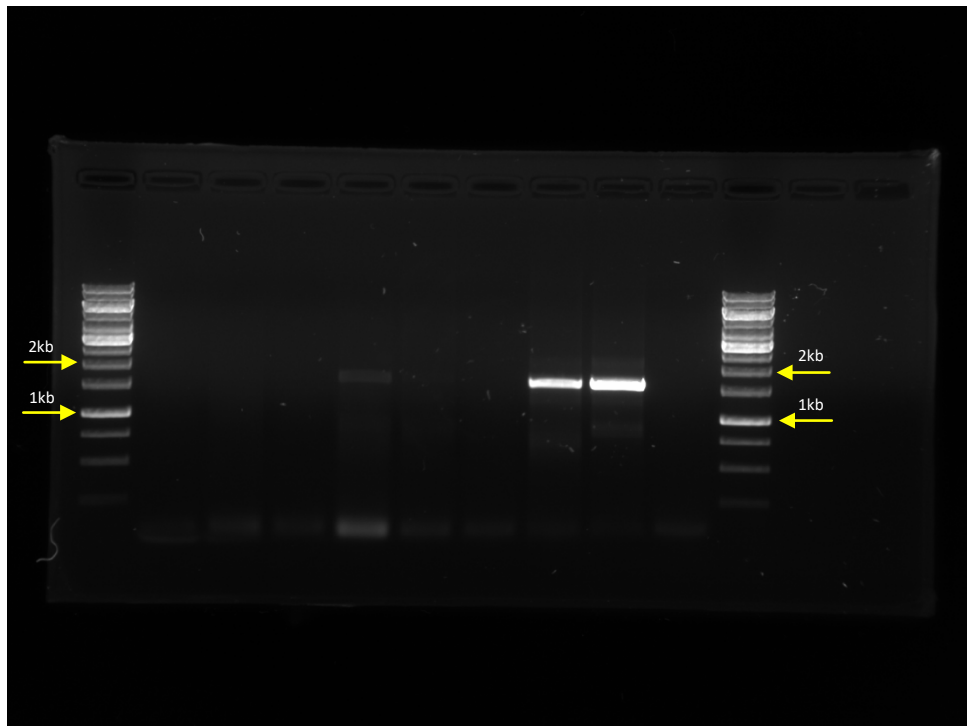

Supplementary Fig. 20 Uncropped gel image of junction PCR

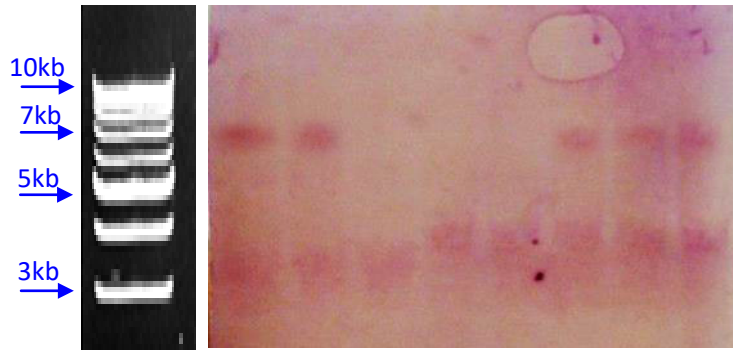

Supplementary Fig. 21 Uncropped blot image of Southern blotting in Fig. 1f

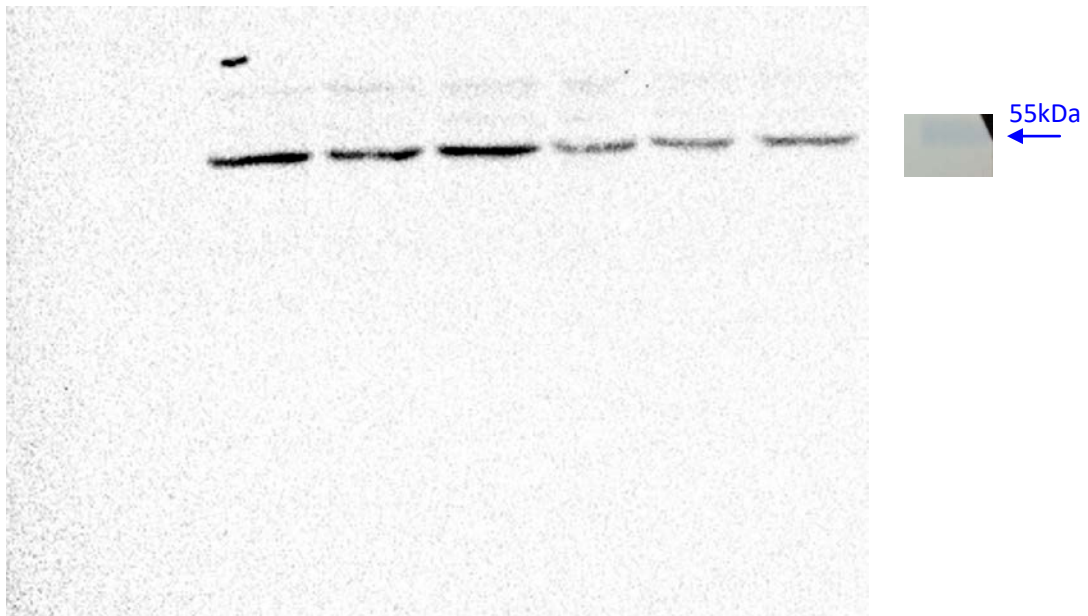

Supplementary Fig. 22 Uncropped blot image of Western blotting for MSTN in Fig. 1l

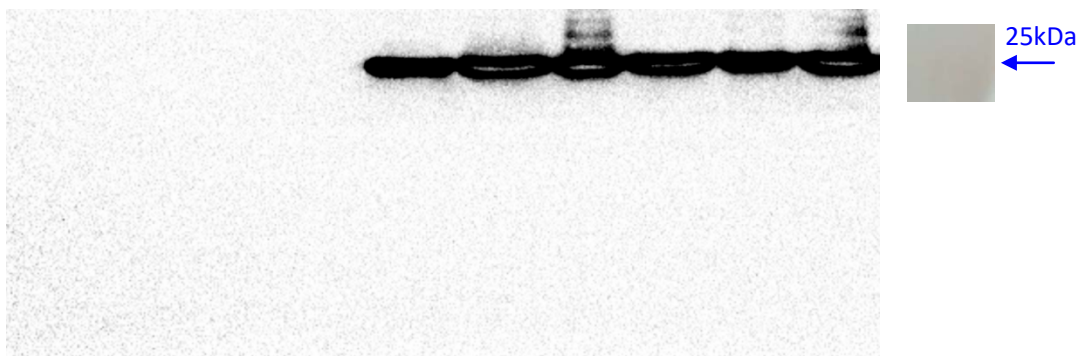

Supplementary Fig. 23 Uncropped blot image of Western blotting for GAPDH in Fig. 1l

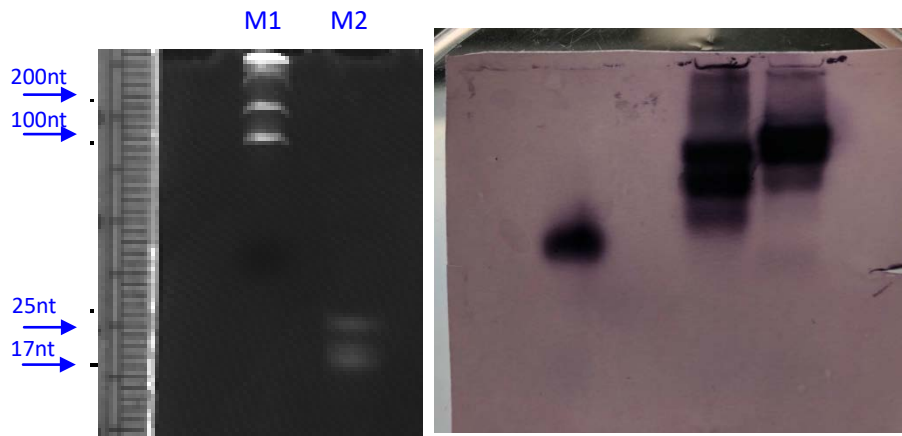

Supplementary Fig. 24 Uncropped blot image of Northern blotting for miR222 in Fig. 2h

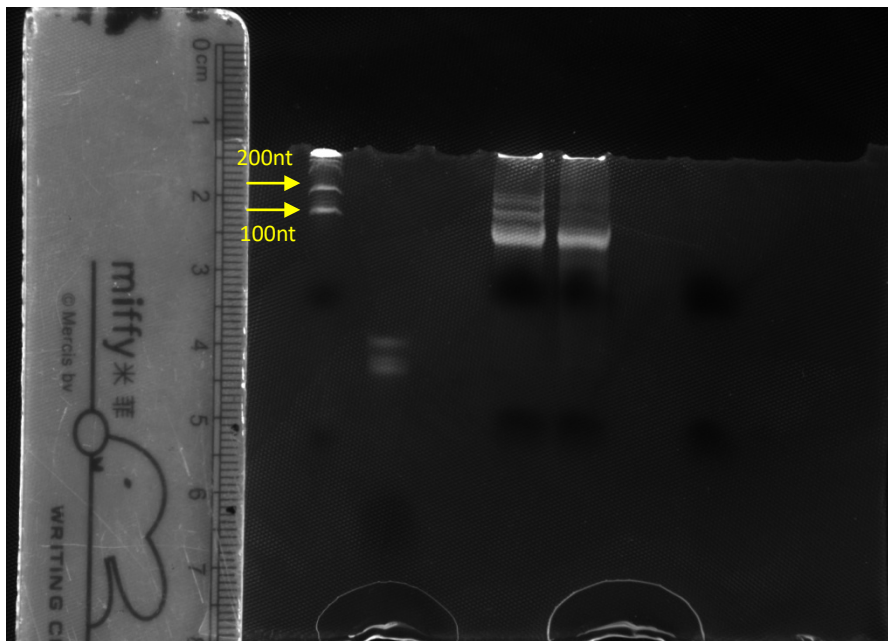

Supplementary Fig. 25 Uncropped gel image of PAGE for small RNA in Fig. 2h

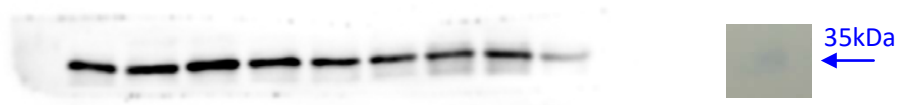

Supplementary Fig. 26 Uncropped blot image of Western blotting for SCD5 Fig. 2j

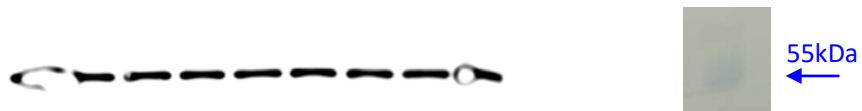

Supplementary Fig. 27 Uncropped blot image of Western blotting for tubulin Fig. 2j

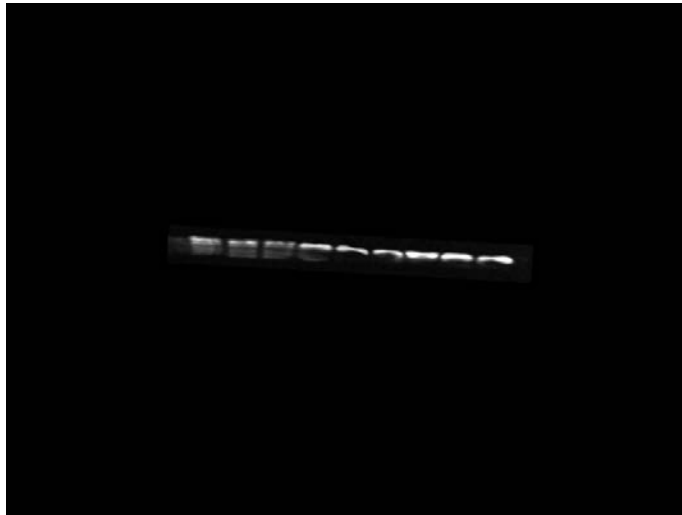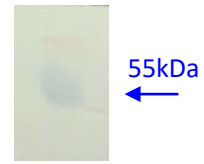

**Supplementary Fig. 28** Uncropped blot image of Western blotting for MEF2C Fig. 4b

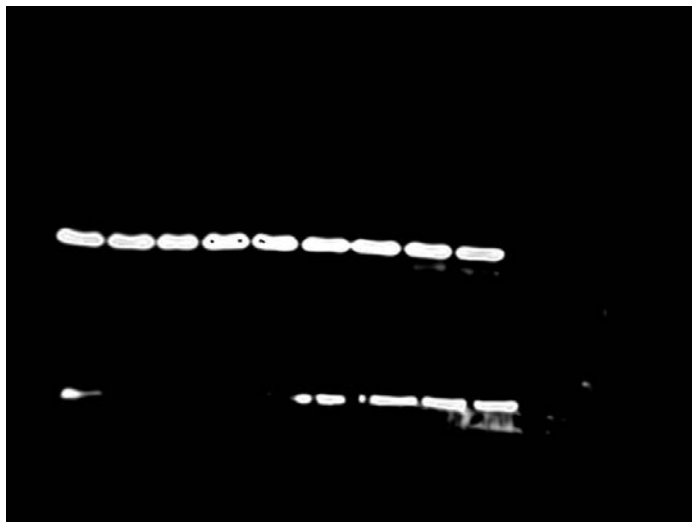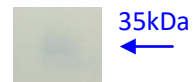

**Supplementary Fig. 29** Uncropped blot image of Western blotting for GAPDH Fig. 4b

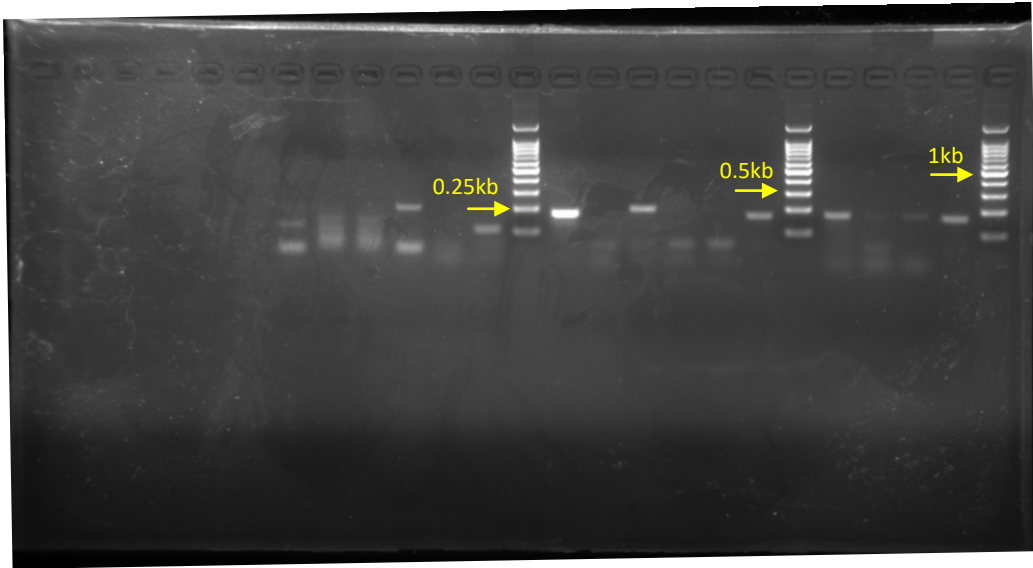

Supplementary Fig. 30 Uncropped gel image of ChIP-PCR in Fig. 4h

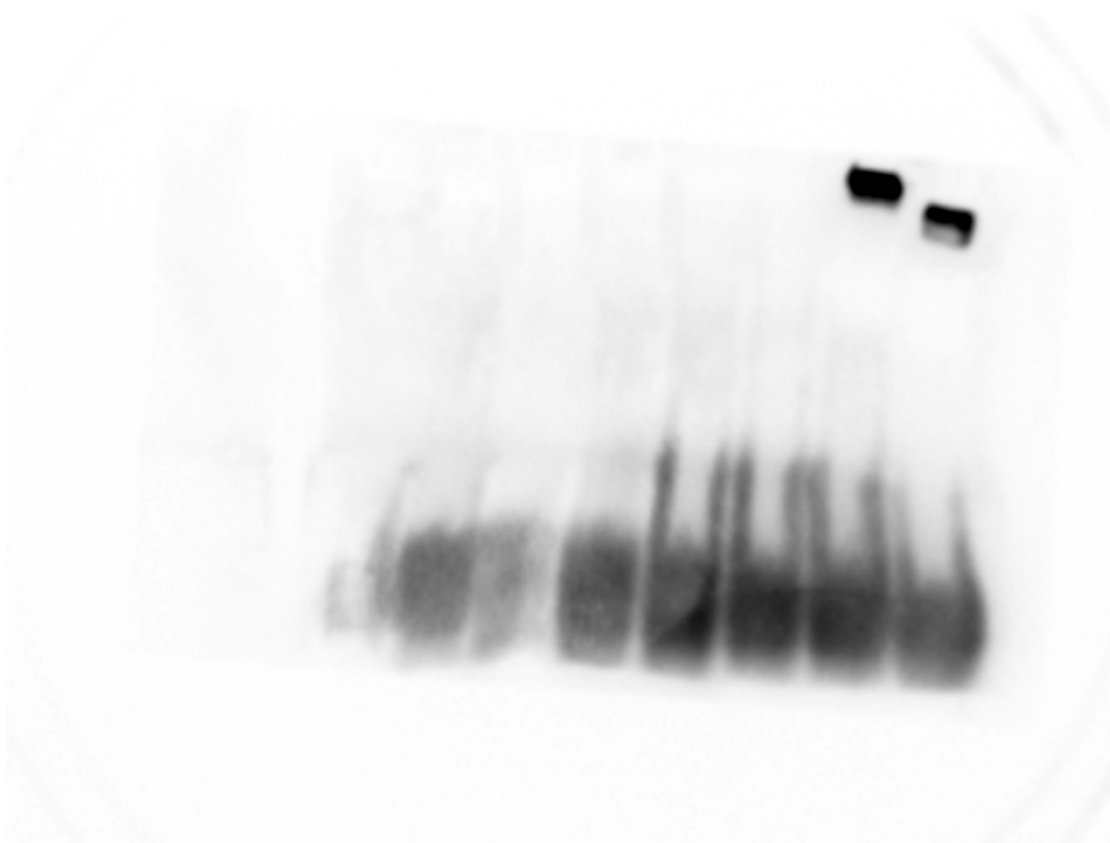

Supplementary Fig. 31 Uncropped gel image of EMSA in Fig. 4k

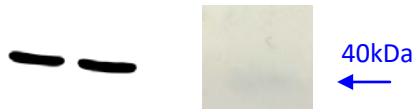

Supplementary Fig. 32 Uncropped blot image of Flag-MSTN in Fig. 5a

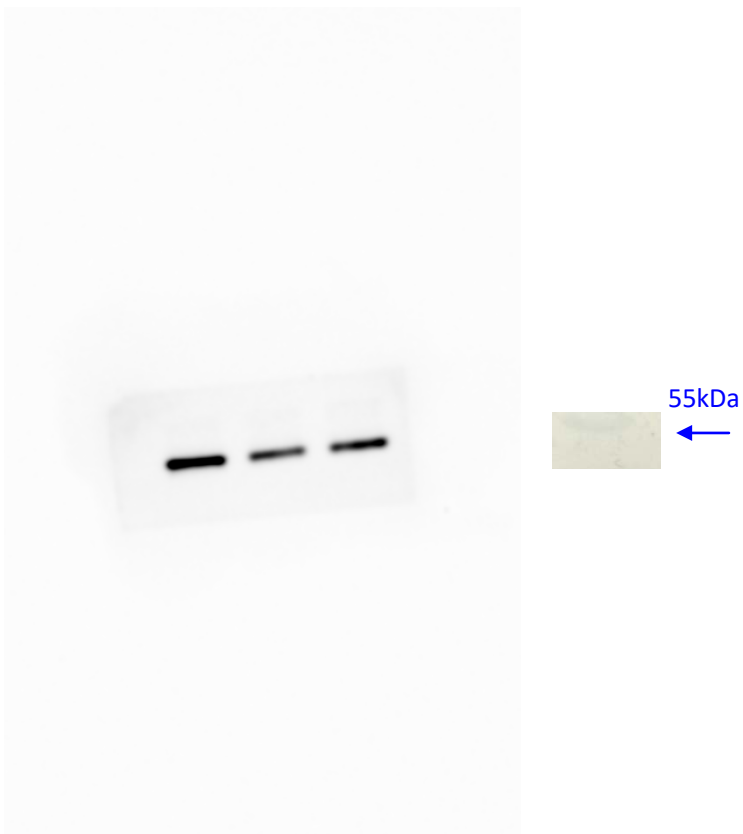

Supplementary Fig. 33 Uncropped blot image of MEF2C in Fig. 5a



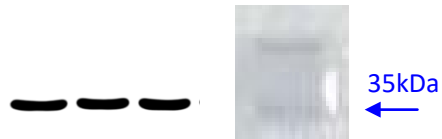

Supplementary Fig. 34 Uncropped blot image of GAPDH in Fig. 5a

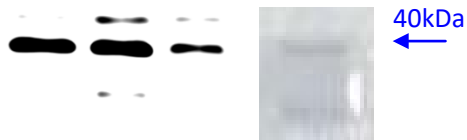

Supplementary Fig. 35 Uncropped blot image of SCD5 in Fig. 5a

## 2、 Supplementary Tables

Supplementary Table 1. DUFAS-mediated HDR efficiency at multiple sites in immortal and primary porcine cells

| Exp.           | Cell type                       | Gene | Target region | CRISPR editing site | Aim | Deletion | Insertion                            | EGFP-only clones (No.) | HDR clones (No.) | HDR efficiency |
|----------------|---------------------------------|------|---------------|---------------------|-----|----------|--------------------------------------|------------------------|------------------|----------------|
| 0 <sup>§</sup> | Porcine PK15                    | MSTN | E3            | T3                  | KO  | 381 bp   | 3 kb Neo <sup>R</sup> /EGFP cassette | 32                     | 2                | 6.3%           |
| 1              | Porcine PK15                    | MSTN | E1            | T1                  | KO  | 0 bp     | 3 kb Neo <sup>R</sup> /EGFP cassette | 36                     | 29               | 80.5%          |
| 2              | Porcine PK15                    | MSTN | E3            | T2                  | KO  | 0 bp     | 3 kb Neo <sup>R</sup> /EGFP cassette | 30                     | 26               | 86.7%          |
| 3              | Porcine PK15                    | MSTN | E3            | T3                  | KO  | 0 bp     | 3 kb Neo <sup>R</sup> /EGFP cassette | 29                     | 24               | 82.3%          |
| 4              | Meishan pig primary fibroblasts | MSTN | E1            | T1                  | KO  | 0 bp     | 3 kb Neo <sup>R</sup> /EGFP cassette | 17                     | 14               | 82.3%          |

<sup>§</sup>Experiment from reference 37. T1 targeting site, located in exon 1 of porcine MSTN, sequence 5'GGCTGTGTAATGCATGTATG3'; T2 targeting site, located in exon 3 of porcine MSTN, sequence 5'GGATTTTGAAGCTTTTGGAT3'; T3 targeting site, located in exon 3 of porcine MSTN, sequence 5'GGCAAAGAACAATAATATA3'. KO, knockout. Exp., experiment.

Supplementary Table 2. SCNT results using primary fetal fibroblast cells as donor nuclei

| Cloning date | Recipient | Donor cells | Cleavage rate (%) | No. of transferred reconstructed embryos | Pregnant sows | Live born | Cloning efficiency (%) | Piglet number and birth weight (kg)                         |
|--------------|-----------|-------------|-------------------|------------------------------------------|---------------|-----------|------------------------|-------------------------------------------------------------|
| 5/18/2018    | #20304    | #MS30       | 68.25             | 167                                      | aborted       | -         | -                      |                                                             |
| 5/19/2018    | #1711     | #MS30       | 70.13             | 161                                      | Delivered     | 4         | 2.48                   | #1020(0.83),<br>#1021(1.15),<br>#1022(0.96),<br>#1023(1.31) |

Supplementary Table 3. Profile of mRNA sequencing

| Sample ID. | Clean reads | Mapped reads | Uniquely mapped reads | Paired mapped reads | Unmapped reads | Transcript coverage (x) |
|------------|-------------|--------------|-----------------------|---------------------|----------------|-------------------------|
| M01        | 75247130    | 73073340     | 68410273              | 35660525            | 2173790        | 123.48                  |
| M02        | 64740926    | 62810918     | 59133062              | 30595861            | 1930008        | 108.92                  |
| M03        | 71910194    | 69371613     | 65079360              | 33667011            | 2538581        | 116.55                  |
| M11        | 63346590    | 60989110     | 56914156              | 29592064            | 2357480        | 102.75                  |
| M12        | 65214872    | 62878188     | 58491445              | 30552730            | 2336684        | 105.51                  |
| M13        | 65018918    | 62780972     | 58425018              | 30498874            | 2237946        | 105.42                  |

Supplementary Table 4. Profile of small RNA sequencing

| Sample ID. | Clean reads | miRNA | rRNA | snoRNA | Mapped reads | Unmapped reads |
|------------|-------------|-------|------|--------|--------------|----------------|
| M01        | 10563627    | 245   | 144  | 2525   | 8612509      | 1951118        |
| M02        | 12705181    | 235   | 152  | 3315   | 10750354     | 1954827        |
| M03        | 8602572     | 244   | 123  | 2698   | 7318434      | 1284138        |
| M11        | 7762315     | 243   | 97   | 2090   | 5961153      | 1801162        |
| M12        | 8458847     | 249   | 39   | 245    | 5790788      | 2668059        |
| M13        | 10806313    | 253   | 63   | 398    | 7212217      | 3594096        |

Supplementary Table 5. Prediction and filtering result of transcription factors (TF) on miR222 promoter

| TF    | Binding site                   | Dissimilarity | log <sub>2</sub> FoldChange in transcriptome |
|-------|--------------------------------|---------------|----------------------------------------------|
| MEF2C | TATAAATACTT(A), GTGTGTGTATA(B) | 3.69          | 2.46670082842888                             |
| IRF4  | TTCCCTAC                       | 4.39          | 1.64628583932162                             |
| CEBPB | TGCAAT                         | 0.00          | 1.20156404677452                             |
| JUN   | AGAGTCA                        | 3.24          | 1.23961703695867                             |
| EP300 | AGTCC                          | 0.00          | -1.268671954                                 |
| MEF2A | TATTTATAGCT                    | 2.66          | -1.11513398752536                            |
